# Supplementary material for: Coupling oxygen storage and catalysis to design redox catalysts for efficient ethylbenzene dehydrogenation
Source: Royal Society of Chemistry journal article supplement (doi:10.1039/d4cy01291g), 2025-01-01
Supplement: d4cy01291g1.pdf [file d4cy01291g1.pdf]

**Supplementary Information**

**Coupling of oxygen storage and catalysis to design redox catalyst for efficient ethylbenzene dehydrogenation**

Juping Zhang, Jiayi Zhou, Dongfang Li, Tao Zhu, Xing Zhu\*

State Key Laboratory of Complex Nonferrous Metal Resources Clean Utilization, Faculty of Metallurgical and Energy Engineering, Kunming University of Science and Technology, Kunming 650093, China

\*Corresponding author: zhuxing@kust.edu.cn (Prof. X. Zhu)

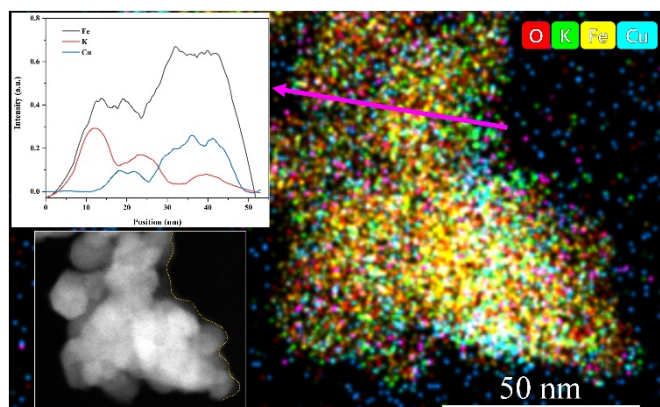

**Fig. S1** HRTEM-EDS and line scan images for the  $\text{CuFe}_2\text{O}_4@\text{KFeO}$  redox catalyst.

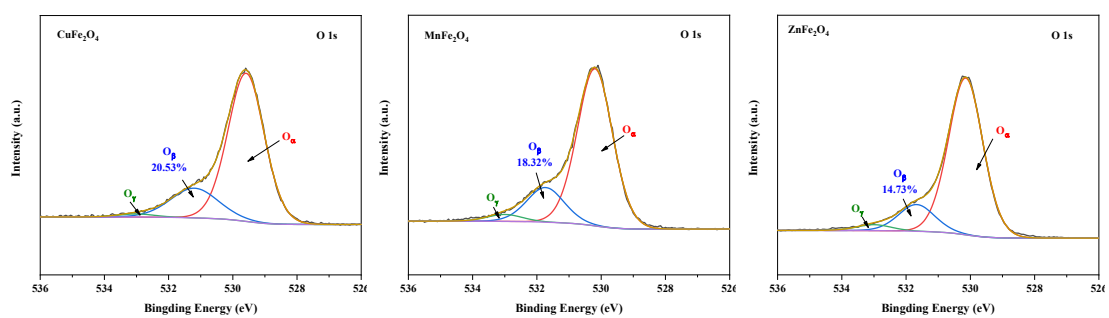

**Fig S2.** The XPS spectra of O 1s for  $\text{CuFe}_2\text{O}_4$ ,  $\text{MnFe}_2\text{O}_4$  and  $\text{ZnFe}_2\text{O}_4$ .

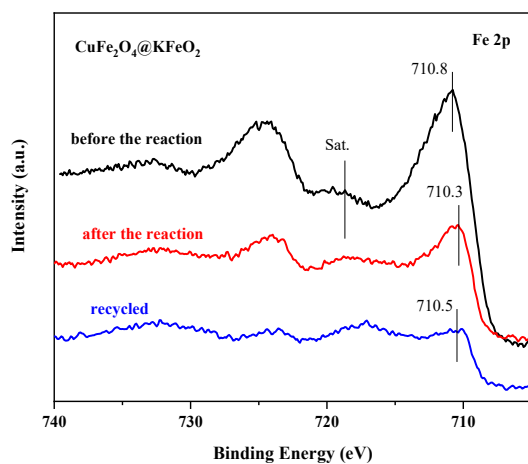

**Fig. S3** Fe 2p XPS spectra of the  $\text{CuFe}_2\text{O}_4@\text{KFeO}$ .

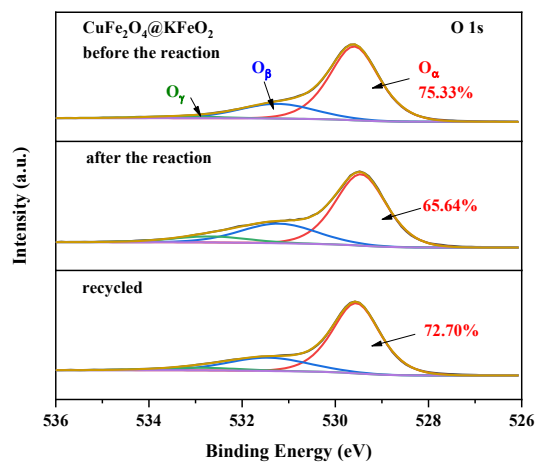

Fig. S4 O 1s XPS spectra of the CuFe<sub>2</sub>O<sub>4</sub>@KFeO.

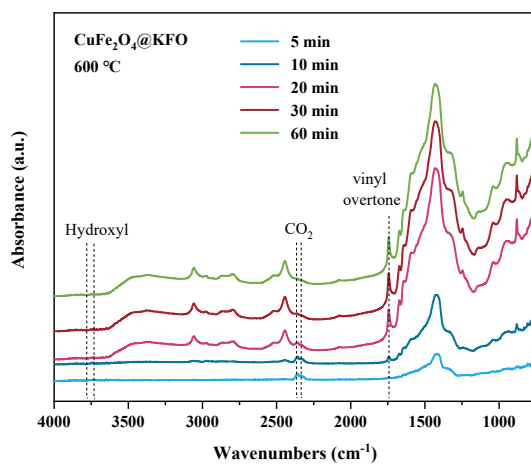

Fig. S5 In situ DRIFTS spectra of ODH reaction of isothermal experiment over CuFe<sub>2</sub>O<sub>4</sub>@KFeO.
